# Supplementary material
Source: PubMed Central journal article supplement (PMC6528657)
Supplement: NIHMS967020-supplement-Supplemental_Table_1.pdf [file NIHMS967020-supplement-Supplemental_Table_1.pdf]

## Supplementary Table S1

Genes highlighted in yellow were a z-test criteria of  $p < 0.05$  (two-tailed) and a z-ratio criteria of  $\geq 11.51$ .

### List of upregulated genes by cocaine

| Gene Name                                                                        | Gene Symbol | GenBank   | 10 $\mu$ M Cocaine<br>z ratio | 100 $\mu$ M Cocaine<br>z ratio |
|----------------------------------------------------------------------------------|-------------|-----------|-------------------------------|--------------------------------|
| <b>Metabolism</b>                                                                |             |           |                               |                                |
| tyrosinase-related protein 1                                                     | TYRP1       | NM_000550 | 1.925                         | 1.272                          |
| glycogenin 1                                                                     | GYG         | NM_004130 | 2.031                         | 1.012                          |
| protein tyrosine phosphatase, non-receptor type 14                               | PTPN14      | NM_005401 | 0.872                         | 1.500                          |
| aldehyde dehydrogenase 1 family, member A1                                       | ALDH1A1     | NM_000689 | 1.402                         | 1.535                          |
| NADH:ubiquinone oxidoreductase core subunit S1                                   | NDUFS1      | BC030833  | 1.328                         | 1.610                          |
| FUS interacting protein (serine/arginine-rich) 1                                 | FUSIP1      | NM_054016 | 0.548                         | 1.655                          |
| v-rel avian reticuloendotheliosis viral oncogene homolog B                       | RELB        | NM_006509 | 1.357                         | 1.655                          |
| flavin containing monooxygenase 4                                                | FMO4        | NM_002022 | 1.373                         | 1.659                          |
| fructose-1,6-bisphosphatase 2                                                    | FBP2        | NM_003837 | 1.190                         | 1.773                          |
| stem-loop binding protein                                                        | SLBP        | NM_006527 | 1.184                         | 1.830                          |
| lipase, hepatic                                                                  | LIPC        | NM_000236 | 1.183                         | 1.838                          |
| thioredoxin-like 1                                                               | TXNL        | NM_004786 | 1.472                         | 1.863                          |
| pyridoxal (pyridoxine, vitamin B6) kinase                                        | PDXK        | NM_003681 | 1.098                         | 1.884                          |
| mannosyl (beta-1,4-)-glycoprotein beta-1,4-N-acetylglucosaminyltransferase       | MGAT3       | NM_002409 | 1.442                         | 1.917                          |
| glucuronidase, beta pseudogene                                                   | SMA4        | NM_006780 | 1.711                         | 3.718                          |
| abhydrolase domain containing 11                                                 | ABHD11      | NM_031295 | 1.561                         | 1.625                          |
| adenosine kinase                                                                 | ADK         | NM_006721 | 1.585                         | 1.519                          |
| acyloxyacyl hydrolase (neutrophil)                                               | AOAH        | NM_001637 | 1.622                         | 1.884                          |
| ATP-binding cassette, sub-family B (MDR/TAP), member 4                           | ABCB4       | NM_018849 | 1.681                         | 2.065                          |
| SLC2A4 regulator                                                                 | SLC2A4RG    | NM_020062 | 1.703                         | 1.524                          |
| thioredoxin                                                                      | TXN         | NM_003329 | 1.835                         | 1.613                          |
| adenosylmethionine decarboxylase 1                                               | AMD1        | NM_001634 | 2.051                         | 2.704                          |
| <b>Growth/trophic factors</b>                                                    |             |           |                               |                                |
| Kruppel-like factor 10                                                           | KLF10       | NM_005655 | 1.108                         | 1.510                          |
| tumor necrosis factor (ligand) superfamily, member 12                            | TNFSF12     | NM_003809 | 1.391                         | 1.544                          |
| insulin-like growth factor binding protein 4                                     | IGFBP4      | NM_001552 | 1.491                         | 1.672                          |
| insulin-like growth factor 2 (somatomedin A)                                     | IGF2        | NM_000612 | 1.126                         | 1.675                          |
| oncostatin M                                                                     | OSM         | NM_020530 | 1.207                         | 1.677                          |
| insulin-like growth factor binding protein 1                                     | IGFBP1      | NM_000596 | 1.131                         | 1.691                          |
| colony stimulating factor 3 (granulocyte)                                        | CSF3        | NM_000759 | 1.373                         | 2.140                          |
| interleukin 12 receptor, beta 2                                                  | IL12RB2     | NM_001559 | 1.721                         | 1.561                          |
| interleukin 12A                                                                  | IL12A       | NM_000882 | 1.775                         | 1.857                          |
| <b>Apoptosis</b>                                                                 |             |           |                               |                                |
| tumor necrosis factor receptor superfamily, member 1B                            | TNFRSF1B    | NM_001066 | 1.178                         | 1.658                          |
| DNA fragmentation factor, 40kDa, beta polypeptide (caspase-activated DNase)      | DFFB        | NM_004402 | 1.370                         | 1.742                          |
| myeloid cell leukemia sequence 1 (BCL2-related)                                  | MCL1        | NM_021960 | 2.614                         | 1.638                          |
| <b>Cell cycle control</b>                                                        |             |           |                               |                                |
| checkpoint kinase 1                                                              | CHEK1       | NM_001274 | 1.584                         | 1.227                          |
| cell division cycle 25C                                                          | CDC25C      | NM_001790 | 0.948                         | 1.555                          |
| cyclin A2                                                                        | CCNA2       | NM_001237 | 4.632                         | 2.396                          |
| <b>Signal transduction</b>                                                       |             |           |                               |                                |
| adenosine A2b receptor                                                           | ADORA2B     | NM_000676 | 0.986                         | 1.507                          |
| ribosomal protein S6 kinase, 90kDa, polypeptide 3                                | RPS6KA3     | NM_004586 | 1.039                         | 1.521                          |
| pyrimidinergic receptor P2Y, G-protein coupled, 6                                | P2RY6       | NM_004154 | 1.045                         | 1.554                          |
| kinase suppressor of ras 1                                                       | KSR1        | U43586    | 1.255                         | 1.594                          |
| mitogen-activated protein kinase kinase kinase kinase 5 (GCKR)                   | MAP4K5      | NM_006575 | 1.116                         | 1.609                          |
| inositol 1,4,5-triphosphate receptor, type 3                                     | ITPR3       | NM_002224 | 1.246                         | 1.658                          |
| active BCR-related gene                                                          | ABR         | NM_021962 | 1.358                         | 1.909                          |
| mitogen-activated protein kinase kinase kinase 10                                | MAP3K10     | NM_002446 | 1.439                         | 1.926                          |
| corticotropin releasing hormone binding protein                                  | CRHBP       | NM_001882 | 1.065                         | 1.985                          |
| mitogen-activated protein kinase kinase 4                                        | MAP2K4      | NM_003010 | 1.802                         | 1.560                          |
| <b>Transcription, translation, and RNA processing</b>                            |             |           |                               |                                |
| DEAD (Asp-Glu-Ala-Asp) box polypeptide 52                                        | DDX52       | AJ010840  | 1.266                         | 1.515                          |
| methyl-CpG binding domain protein 1                                              | MBD1        | NM_015846 | 1.222                         | 1.612                          |
| signal transducer and activator of transcription 3 (acute-phase response factor) | STAT3       | NM_139276 | 1.058                         | 1.617                          |
| SKI-like oncogene                                                                | SKIL        | NM_005414 | 1.312                         | 1.635                          |
| cAMP responsive element binding protein 1                                        | CREB1       | NM_134442 | 1.482                         | 1.809                          |
| POU class 6 homeobox 1                                                           | POU6F1      | NM_002702 | 1.607                         | 1.725                          |
| MDM2 proto-oncogene, E3 ubiquitin protein ligase                                 | MDM2        | NM_002392 | 1.642                         | 1.615                          |
| msh homeobox 1                                                                   | MSX1        | NM_002448 | 1.735                         | 2.527                          |
| jun B proto-oncogene                                                             | JUNB        | NM_002229 | 1.951                         | 1.964                          |

|                                                       |        |           |       |       |
|-------------------------------------------------------|--------|-----------|-------|-------|
| v-fos FBJ murine osteosarcoma viral oncogene homolog  | FOS    | NM_005252 | 2.216 | 2.175 |
| <b>Protein processing</b>                             |        |           |       |       |
| hsp70-interacting protein                             | HSPBP1 | NM_012267 | 1.504 | 1.180 |
| proteasome 26S subunit, non-ATPase 12                 | PSMD12 | NM_002816 | 1.208 | 1.516 |
| presenilin 1                                          | PSEN1  | NM_007318 | 0.865 | 1.594 |
| calnexin                                              | CANX   | NM_001746 | 1.257 | 1.605 |
| <b>Structural</b>                                     |        |           |       |       |
| midline 1                                             | MID1   | AF041210  | 1.449 | 1.623 |
| neurofilament, medium polypeptide                     | NEFM   | NM_005382 | 1.006 | 1.876 |
| dynamamin 1                                           | DNM1   | NM_004408 | 1.757 | 1.920 |
| nucleoporin 88kDa                                     | NUP88  | NM_002532 | 1.895 | 1.690 |
| <b>Adhesion</b>                                       |        |           |       |       |
| integrin subunit beta 2                               | ITGB2  | NM_000211 | 1.683 | 0.906 |
| chemokine (C-X-C motif) receptor 3                    | CXCR3  | NM_001504 | 2.882 | 1.725 |
| zyxin                                                 | ZYX    | NM_003461 | 0.870 | 1.516 |
| inositol polyphosphate phosphatase like 1             | INPPL1 | NM_001567 | 1.024 | 1.522 |
| catenin delta 2                                       | CTNND2 | NM_001332 | 1.609 | 1.593 |
| neuronal cell adhesion molecule                       | NRCAM  | NM_005010 | 1.710 | 1.999 |
| <b>Development</b>                                    |        |           |       |       |
| delta-like 1 homolog (Drosophila)                     | DLK1   | NM_003836 | 1.886 | 1.333 |
| secreted protein, acidic, cysteine-rich (osteonectin) | SPARC  | NM_003118 | 1.239 | 1.506 |
| cold shock domain containing E1, RNA-binding          | CSDE1  | NM_007158 | 1.003 | 1.835 |
| lumican                                               | LUM    | NM_002345 | 1.149 | 2.132 |
| <b>Neurotransmission</b>                              |        |           |       |       |
| dopamine receptor D2                                  | DRD2   | NM_000795 | 0.778 | 1.518 |
| prodynorphin                                          | PDYN   | NM_024411 | 0.970 | 1.561 |
| neuropeptide Y receptor Y1                            | NPY1R  | NM_000909 | 1.451 | 1.737 |

### List of downregulated genes by cocaine

| Gene Name                                                | Gene Symbol | GenBank   | 10 $\mu$ M Cocaine<br>z ratio | 100 $\mu$ M Cocaine<br>z ratio |
|----------------------------------------------------------|-------------|-----------|-------------------------------|--------------------------------|
| <b>Metabolism</b>                                        |             |           |                               |                                |
| translocator protein                                     | TSPO        | NM_000714 | -0.869                        | -1.505                         |
| phosphoinositide-3-kinase, class 3                       | PIK3C3      | NM_002647 | -1.068                        | -1.573                         |
| high-mobility group nucleosomal binding domain 2         | HMGN2       | NM_005517 | -15.478                       | -15.328                        |
| ribokinase                                               | RBSK        | NM_022128 | -15.761                       | -13.385                        |
| cytochrome P450, family 2, subfamily B, polypeptide 6    | CYP2B6      | NM_000767 | -16.007                       | -16.537                        |
| uncoupling protein 1 (mitochondrial, proton carrier)     | UCP1        | NM_021833 | -17.739                       | -15.986                        |
| <b>Growth/trophic factors</b>                            |             |           |                               |                                |
| transforming growth factor, beta 2                       | TGFB2       | NM_003238 | -1.495                        | -1.523                         |
| fibroblast growth factor receptor 4                      | FGFR4       | NM_002011 | -3.594                        | -2.495                         |
| latent transforming growth factor beta binding protein 4 | LTBP4       | NM_003573 | -15.727                       | -18.839                        |
| chemokine (C-X-C motif) ligand 10                        | CXCL10      | NM_001565 | -16.853                       | -12.510                        |
| <b>Apoptosis</b>                                         |             |           |                               |                                |
| BCL2-associated X protein                                | BAX         | NM_138764 | -1.879                        | -1.852                         |
| <b>Signal transduction</b>                               |             |           |                               |                                |
| membrane protein, palmitoylated 3                        | MPP3        | NM_001932 | -1.246                        | -1.564                         |
| heat shock 70kDa protein 4                               | HSPA4       | AB023420  | -6.114                        | -5.018                         |
| annexin A5                                               | ANXA5       | NM_001154 | -8.883                        | -6.025                         |
| GTP binding protein 1                                    | GTPBP1      | NM_004286 | -15.221                       | -14.419                        |
| <b>Transcription, translation, and RNA processing</b>    |             |           |                               |                                |
| GA binding protein transcription factor, beta subunit 2  | GABPB2      | NM_005254 | -1.407                        | -1.520                         |
| <b>Structural</b>                                        |             |           |                               |                                |
| actin, alpha, cardiac muscle 1                           | ACTC        | AK056592  | -1.829                        | -2.009                         |
