# Supplementary material
Source: PubMed Central journal article supplement (PMC6528657)
Supplement: NIHMS967020-supplement-Supplemental_Table_2.pdf [file NIHMS967020-supplement-Supplemental_Table_2.pdf]

## Supplementary Table S2

### BioCarta Pathways

| Term                                                                           | P-value    | Z-score      | Combined Score | Genes                   |
|--------------------------------------------------------------------------------|------------|--------------|----------------|-------------------------|
| repression of pain sensation by the transcriptional regulator dream            | 0.00303293 | -1.605495601 | 2.014786426    | RPS6KA3;CREB1;FOS       |
| pdgf signaling pathway                                                         | 0.01197648 | -1.938116718 | 1.938347571    | MAP2K4;STAT3;FOS        |
| no2-dependent il-12 pathway in nk cells                                        | 0.01394357 | -0.685077496 | 0.685159097    | IL12A;IL12RB2           |
| mapkinase signaling pathway                                                    | 0.01696817 | -1.360420771 | 1.360582813    | MAP2K4;CREB1;FOS;MAP4K5 |
| ceramide signaling pathway                                                     | 0.02160869 | -1.484490263 | 1.484667084    | MAP2K4;KSR1;BAX         |
| calcium signaling by hbv of hepatitis b virus                                  | 0.03237351 | -1.274253048 | 1.274404827    | CREB1;FOS               |
| il12 and stat4 dependent signaling pathway in th1 development                  | 0.03237351 | -0.797633026 | 0.797728034    | IL12A;IL12RB2           |
| atm signaling pathway                                                          | 0.04383133 | -0.769852661 | 0.769944359    | CHEK1;MDM2              |
| regulation of cell cycle progression by plk3                                   | 0.04383133 | -0.719236943 | 0.719322612    | CHEK1;BAX               |
| oxidative stress induced gene expression via nrf2                              | 0.04383133 | -0.618396593 | 0.618470252    | CREB1;FOS               |
| egf signaling pathway                                                          | 0.05218983 | -0.976654046 | 0.976770377    | MAP2K4;STAT3            |
| hypoxia and p53 in the cardiovascular system                                   | 0.05656825 | -0.581381436 | 0.581450686    | MDM2;BAX                |
| inhibition of cellular proliferation by gleevec                                | 0.06107229 | -1.086624219 | 1.086753649    | MAP2K4;FOS              |
| cell cycle: g2/m checkpoint                                                    | 0.06107229 | -0.494267533 | 0.494326406    | CHEK1;MDM2              |
| induction of apoptosis through dr3 and dr4/5 death receptors                   | 0.06569677 | -0.354871579 | 0.354913849    | DFFB;TNFSF12            |
| ctcf: first multivalent nuclear factor                                         | 0.06569677 | -0.248115809 | 0.248145363    | TGFB2;MDM2              |
| hiv-1 nef: negative effector of fas and tnf                                    | 0.06689068 | -0.624751732 | 0.624826147    | DFFB;MDM2;PSEN1         |
| tpo signaling pathway                                                          | 0.07043661 | -0.782100669 | 0.782193827    | STAT3;FOS               |
| signaling pathway from g-protein families                                      | 0.08024272 | -0.701597183 | 0.64816596     | RPS6KA3;CREB1           |
| fc epsilon receptor i signaling in mast cells                                  | 0.09569751 | -0.731973819 | 0.633731096    | MAP2K4;FOS              |
| p38 mapk signaling pathway                                                     | 0.10102998 | -0.359894391 | 0.311590744    | MAP2K4;CREB1            |
| proteolysis and signaling pathway of notch                                     | 0.11321881 | 6.09028385   | -5.272869278   | PSEN1                   |
| multi-drug resistance factors                                                  | 0.11321881 | 7.51843151   | -6.509336428   | ABCB4                   |
| p53 signaling pathway                                                          | 0.12026195 | -0.177057602 | 0.153293609    | CHEK1;MDM2;BAX          |
| angiotensin ii mediated activation of jnk pathway via pyk2 dependent signaling | 0.12315202 | -0.622926913 | 0.539320049    | MAP2K4;FOS              |
| tsp-1 induced apoptosis in microvascular endothelial cell                      | 0.12834625 | 3.552363877  | -3.075579203   | FOS                     |
| cdc25 and chk1 regulatory pathway in response to dna damage                    | 0.12834625 | 6.159490733  | -5.332787477   | CHEK1                   |
| toll-like receptor pathway                                                     | 0.12886074 | 0.032497042  | -0.028135413   | MAP2K4;FOS              |
| signal transduction through il1r                                               | 0.13463317 | 0.060161981  | -0.052087271   | TGFB2;FOS               |
| g-secretase mediated erbb4 signaling pathway                                   | 0.14322439 | 4.04556395   | -3.502583851   | PSEN1                   |
| stat3 signaling pathway                                                        | 0.14322439 | 5.769332183  | -4.994994514   | STAT3                   |
| ca-calmodulin-dependent protein kinase activation                              | 0.14322439 | 6.365176681  | -5.510867045   | CREB1                   |
| pertussis toxin-insensitive ccr5 signaling in macrophage                       | 0.15785719 | 4.160554713  | -3.41987065    | FOS                     |
| il22 soluble receptor signaling pathway                                        | 0.18640232 | 5.195641303  | -4.270685624   | STAT3                   |
| apoptotic dna-fragmentation and tissue homeostasis                             | 0.18640232 | 6.23979288   | -5.128951787   | DFFB                    |
| il 3 signaling pathway                                                         | 0.20032228 | 3.579765804  | -2.942476869   | FOS                     |
| tnfr2 signaling pathway                                                        | 0.20032228 | 5.044933086  | -4.146807285   | TNFRSF1B                |
| granzyme a mediated apoptosis pathway                                          | 0.20032228 | 6.282508835  | -5.164063221   | DFFB                    |
| il 6 signaling pathway                                                         | 0.21401216 | 3.843427798  | -3.159200354   | STAT3                   |
| erythropoietin mediated neuroprotection through nf-kb                          | 0.21401216 | 4.198307601  | -3.450902568   | CREB1                   |
| melanocyte development and pigmentation pathway                                | 0.21401216 | 4.207674701  | -3.458602087   | CREB1                   |
| role of mitochondria in apoptotic signaling                                    | 0.21401216 | 5.390078629  | -4.430508184   | BAX                     |
| rb tumor suppressor/checkpoint signaling in response to dna damage             | 0.21401216 | 5.529889403  | -4.545429101   | CHEK1                   |
| apoptotic signaling in response to dna damage                                  | 0.22747563 | 4.381701152  | -3.601647425   | BAX                     |
| transcription regulation by methyltransferase of carm1                         | 0.22747563 | 4.59226472   | -3.774725347   | CREB1                   |
| sumoylation by ranbp2 regulates transcriptional repression                     | 0.22747563 | 5.454307875  | -4.483302998   | MDM2                    |
| keratinocyte differentiation                                                   | 0.23936608 | 0.734391975  | -0.603651612   | MAP2K4;FOS              |
| gamma-aminobutyric acid receptor life cycle pathway                            | 0.24071629 | 4.640591773  | -3.814448962   | DNM1                    |
| mechanisms of transcriptional repression by dna methylation                    | 0.24071629 | 6.155072399  | -5.059313697   | MBD1                    |
| human cytomegalovirus and map kinase pathways                                  | 0.25373772 | 3.241550013  | -2.664472051   | CREB1                   |
| cadmium induces dna synthesis and proliferation in macrophages                 | 0.25373772 | 4.090855834  | -3.362579936   | FOS                     |
| bone remodeling                                                                | 0.25373772 | 4.243485949  | -3.488038026   | FOS                     |
| hypoxia-inducible factor in the cardiovascular system                          | 0.25373772 | 4.781389934  | -3.930181485   | CREB1                   |
| endocytotic role of ndk phosphins and dynamin                                  | 0.25373772 | 5.571766739  | -4.579851211   | DNM1                    |
| map kinase inactivation of smrt corepressor                                    | 0.2665434  | 3.420859945  | -2.811860276   | MAP2K4                  |
| nerve growth factor pathway (ngf)                                              | 0.2665434  | 3.563556134  | -2.929152931   | FOS                     |
| tnfr1 signaling pathway                                                        | 0.2665434  | 5.134266812  | -4.220237346   | MAP2K4                  |
| mets affect on macrophage differentiation                                      | 0.27913679 | 4.277257329  | -3.39272714    | FOS                     |
| gata3 participate in activating the th2 cytokine genes expression              | 0.29152129 | 4.305333805  | -3.374055732   | JUNB                    |
| er associated degradation (erad) pathway                                       | 0.29152129 | 4.975862916  | -3.899544044   | CANX                    |
| igf-1 signaling pathway                                                        | 0.30370024 | 3.2094659    | -2.50973253    | FOS                     |
| fas signaling pathway (cd95)                                                   | 0.30370024 | 4.501728608  | -3.520253862   | MAP2K4                  |
| erk1/erk2 mapk signaling pathway                                               | 0.32745459 | 3.332861941  | -2.606225551   | STAT3                   |
| role of brca1 brca2 and atr in cancer susceptibility                           | 0.32745459 | 3.988123189  | -3.118625595   | CHEK1                   |
| how progesterone initiates the oocyte maturation                               | 0.33903643 | 3.383671551  | -2.645957561   | CDC25C                  |

|                                                                             |            |             |              |            |
|-----------------------------------------------------------------------------|------------|-------------|--------------|------------|
| regulation of bad phosphorylation                                           | 0.33903643 | 3.49315269  | -2.73156943  | BAX        |
| tumor suppressor arf inhibits ribosomal biogenesis                          | 0.33903643 | 3.758739346 | -2.939252419 | MDM2       |
| tnf/stress related signaling                                                | 0.33903643 | 3.790798076 | -2.964321648 | MAP2K4     |
| caspase cascade in apoptosis                                                | 0.33903643 | 4.420578919 | -3.45679657  | DFFB       |
| regulation of ck1/cdk5 by type 1 glutamate receptors                        | 0.35042558 | 3.938744273 | -3.080012357 | DRD2       |
| proteasome complex                                                          | 0.35042558 | 4.437924528 | -3.470360459 | PSMD12     |
| segmentation clock                                                          | 0.35042558 | 4.650591815 | -3.636661653 | PSEN1      |
| skeletal muscle hypertrophy is regulated via akt-mtor pathway               | 0.36162514 | 3.696163666 | -2.825021446 | INPPL1     |
| role of erk5 in neuronal survival pathway                                   | 0.37263815 | 3.055188807 | -2.32603978  | CREB1      |
| links between pyk2 and map kinases                                          | 0.37263815 | 3.444603138 | -2.622516784 | MAP2K4     |
| transcription factor creb and its extracellular signals                     | 0.38346761 | 3.155197479 | -2.394828819 | CREB1      |
| alk in cardiac myocytes                                                     | 0.38346761 | 4.133046948 | -3.137027082 | TGFB2      |
| role of erbb2 in signal transduction and oncology                           | 0.39411647 | 3.004428046 | -2.275138781 | STAT3      |
| ?-arrestins in gpcr desensitization                                         | 0.39411647 | 4.040599332 | -3.059791781 | DNM1       |
| nfb activation by nontypeable hemophilus influenzae                         | 0.40458764 | 3.949325367 | -2.93679238  | TGFB2      |
| role of ?-arrestins in the activation and targeting of map kinases          | 0.41488398 | 3.429016026 | -2.507270449 | DNM1       |
| bcr signaling pathway                                                       | 0.4250083  | 3.036627364 | -2.220358842 | FOS        |
| erk and pi-3 kinase are necessary for collagen binding in corneal epithelia | 0.4250083  | 3.312592783 | -2.422142658 | ZYX        |
| bioactive peptide induced signaling pathway                                 | 0.44475195 | 2.955151953 | -2.15607229  | STAT3      |
| role of egf receptor transactivation by gpors in cardiac hypertrophy        | 0.44475195 | 3.003605981 | -2.191424241 | FOS        |
| integrin signaling pathway                                                  | 0.44475195 | 3.257256954 | -2.376487427 | ZYX        |
| antigen processing and presentation                                         | 0.44620159 | 3.605033849 | -2.630224676 | CREB1;CANX |
| roles of ? arrestin dependent recruitment of src kinases in gpcr signaling  | 0.45437669 | 3.249736795 | -2.349139629 | DNM1       |
| tgf beta signaling pathway                                                  | 0.5092162  | 3.603838524 | -2.235187816 | TGFB2;SKIL |
| il-2 receptor beta chain in t cell activation                               | 0.58079346 | 2.876590863 | -1.437935762 | FOS        |
| mtor signaling pathway                                                      | 0.63612513 | 3.353165271 | -1.426319997 | RPS6KA3    |
| t cell receptor signaling pathway                                           | 0.63962612 | 3.59364422  | -1.528611386 | MAP2K4;FOS |
| insulin signaling pathway                                                   | 0.90849223 | 3.606149495 | -0.307509553 | FBP2       |
| wnt signaling pathway                                                       | 0.93707317 | 3.766949264 | -0.244828771 | PSEN1      |
